# Supplementary material for: SRC family kinase (SFK) inhibition reduces rhabdomyosarcoma cell growth in vitro and in vivo and triggers p38 MAP kinase-mediated differentiation
Source: PubMed Central journal article supplement (PMC4494948; doi:10.18632/oncotarget.3043), 2015-02-03
Supplement: oncotarget-06-12421-s001.pdf [file oncotarget-06-12421-s001.pdf]

## SUPPLEMENTARY FIGURE AND TABLE

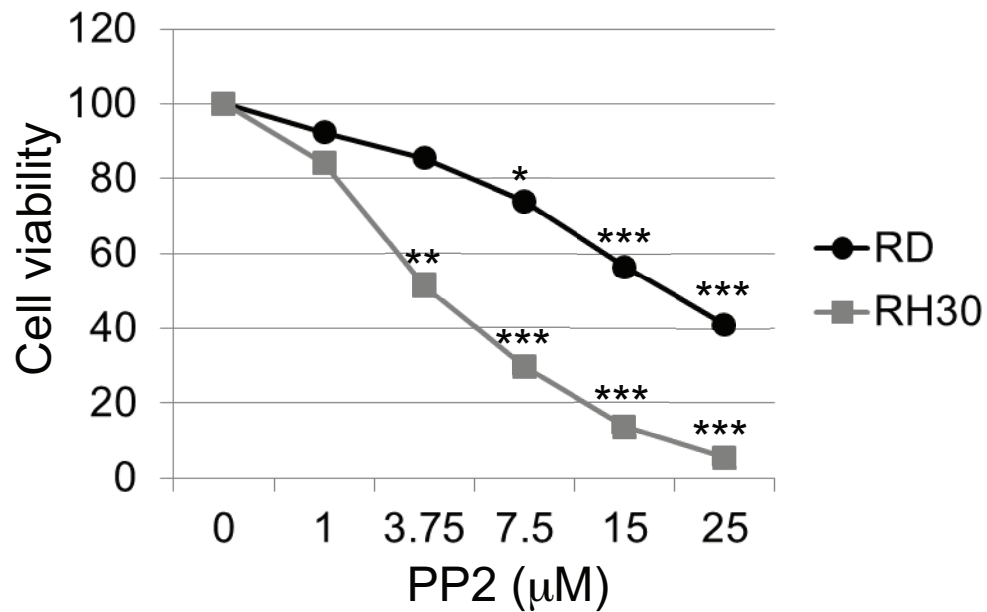

| IC50 values (μM) |       |
|------------------|-------|
| Cell lines       | PP2   |
| RD               | 19.12 |
| RH30             | 3.79  |

**Supplementary Figure 1: MTS analysis of cell viability in RMS cell lines (RD and RH30) 72 hours after treatment with PP2.** Results are reported as means of three independent experiments, each conducted in triplicate, and expressed as percentages of cell viability calculated with respect to control cells treated with DMSO alone. The absorbance values of treated and control samples were subjected to one-way Anova with Dunnett post-test. Statistically significant differences between treated and control cells are indicated with \*: significant ( $P < 0.05$ ), \*\*: very significant ( $P < 0.01$ ) and \*\*\*: extremely significant ( $P < 0.001$ ). The table reports the IC50 values of PP2 on RMS cell lines.

**Supplementary Table S1: Kinase selectivity profile of SI221 (10  $\mu$ M)**

| Kinase         | Residual activity (%) |
|----------------|-----------------------|
| BLK            | 75                    |
| CHK1           | 99                    |
| cKIT           | 97                    |
| CSK            | 92                    |
| EGFR           | 96                    |
| EPHA2          | 101                   |
| FAK            | 102                   |
| FGFR1          | 83                    |
| FGFR2          | 91                    |
| FGFR3          | 95                    |
| FGR            | 70                    |
| FYN            | 71                    |
| GSK3 $\beta$   | 94                    |
| HCK            | 28                    |
| IGF-1R         | 98                    |
| JAK2           | 107                   |
| LCK            | 53                    |
| LYN            | 66                    |
| MET            | 75                    |
| mTOR           | 95                    |
| PDGFR $\alpha$ | 96                    |
| PDGFR $\beta$  | 94                    |
| PIM-1          | 90                    |
| PKA            | 100                   |
| PKC $\alpha$   | 106                   |
| ROCK-I         | 93                    |
| SRC            | 65                    |
| SYK            | 112                   |
| YES            | 23                    |

Shading indicates SFK members
